# Supplementary material
Source: PubMed Central journal article supplement (PMC4639414)

## 1 **Supplementary data**

### 2 **Supplementary Materials and Methods**

#### 3 **Targeted genome mutagenesis in zebrafish by CRISPR/cas9 system**

4 We identified the *nlz1* specific CRISPR target sequence 5'GGGATCACGGTACGGCAGTG3'  
5 from UCSC Genome Browser in "CRISPRS" track of the "Zebrafish Genomics" data hub of  
6 "Burgess Lab Zebrafish Genomic Resources" (<http://genome.ucsc.edu/cgi-bin/hg> HubConnect)  
7 (LaFave et al., 2014). The Sg RNA template assembly, Single –guide RNA (Sg RNA) synthesis  
8 and *in-vitro* Cas-9 (Jao et al., 2013) mRNA synthesis were performed as described in (Varshney  
9 et al., 2015). Embryos at 1-cell stage were co-injected with 250 pico-gram (pg) cas9 mRNA and  
10 25 pg *nlz1* Sg RNA. The injected embryos were raised to adulthood (putative F0 founders) to  
11 screen for germline transmission of CRISPR/cas9induced mutation. Three pairs of putative F0  
12 founder males and females were inter-crossed in one tank to generate F1 embryos and to observe  
13 any visible phenotypic changes at 48h of development. F1 embryos with visible *nlz1* morphant  
14 like phenotype were selected and imaged using Leica Sp2 (Leica, Switzerland) microscope. The  
15 genomic target region (250bp) in F1 embryos were PCR amplified using forward and reverse  
16 primers (5'GTCGTACCTCAATGCTCACG3', 5'CCTGGATTTGCAGTCAGTCC3') flanking  
17 the *nlz1* target site in the genome. The PCR product was cloned into PCR2.1-TOPO vector and  
18 recombinant clones were sequenced as described in (Jao et al., 2013).

#### 19 **Plasmid Constructs**

20 The ORF of human (H) *NLZI*, and *HFOXJ1* were PCR amplified and sub-cloned into into  
21 pCDNA3 vector. The genomic region containing ~2 kb upstream of the *HNLZI* translation start  
22 site was PCR amplified and the fragment was cloned into pGL4 luciferase reporter vector  
23 (Promega), designated as 2kb*NLZI* –*luc*.

1 **ChIP assay**

2 ChIP was performed with the Active Motif ChIP-IT Express kit and ChIP-IT Control Kits. Cells  
3 were transfected with the *HFOXJ1* construct. Chromatin was extracted and sheared by sonication  
4 following the Active Motif ChIP-IT protocol, then immunoprecipitated using a mouse  
5 monoclonal IgG anti-Foxj1 antibody (Santa Cruz Biotechnology), a mouse monoclonal RNA  
6 Polymerase II antibody as a positive control, and a mouse monoclonal IgG antibody as a  
7 negative control. DNA was de-crosslinked, purified, and analyzed by PCR.

8 **Supplementary References**

9 Jao, L.E., Wente, S.R., Chen, W., 2013. Efficient multiplex biallelic zebrafish genome editing  
10 using a CRISPR nuclease system. Proceedings of the National Academy of Sciences of the  
11 United States of America 110, 13904-13909.  
12 LaFave, M.C., Varshney, G.K., Vemulapalli, M., Mullikin, J.C., Burgess, S.M., 2014. A defined  
13 zebrafish line for high-throughput genetics and genomics: NHGRI-1. Genetics 198, 167-170.  
14 Varshney, G.K., Pei, W., LaFave, M.C., Idol, J., Xu, L., Gallardo, V., Carrington, B., Bishop, K.,  
15 Jones, M., Li, M., Harper, U., Huang, S.C., Prakash, A., Chen, W., Sood, R., Ledin, J., Burgess,  
16 S.M., 2015. High-throughput gene targeting and phenotyping in zebrafish using CRISPR/Cas9.  
17 Genome research 25, 1030-1042.

18

19 **Supplementary Figure Legends**

20 **Fig. S1 Classification of gross morphology of *nlz1* morphant fish at 24h**

21 (A) Class I, normal fish; Class II, embryos with abnormal phenotype, and Class III, embryos  
22 with very severe defects and dead embryos. (B-D) Bar diagrams summarize the phenotypes

1 resulted from injection of (B) different doses of morpholino(s), (C) rescue of morphant  
2 phenotype by RNA injection, where very low dose of MO1 and MO2 coinjection resulted in  
3 predominantly ClassII like phenotype. Coinjection dose is stated for total MO. (D)  
4 Approximately 200 embryos were injected with *Nlz1* MO1 and divided into three groups, the  
5 embryos from two of these three groups were separately injected with wild-type *nlz1* mRNA and  
6 Mut *nlz1* mRNA (containing an engineered stop codon.) The phenotypes of embryos from all  
7 three groups were observed at 24h. Morphants injected with *nlz1* mRNA—but not those with  
8 Mut *nlz1* mRNA were rescued. Scale bar, 100 $\mu$ m.

9 **Fig. S2 CRISPR/Cas9 mediated *nlz1* knockout alters heart laterality and motile cilia**  
10 **formation**

11 (A) Wild-type embryo at 48h. After putative F0 founders (3 male and 3 female) were bred in one  
12 tank, the F1 *nlz1* mutants (B, n=20/150) had bent tail, hydrocephaly, ocular coloboma, and three  
13 otoliths in the otic vesicle. (C) *in situ* hybridization using *cmlc2* ribo probe showed different  
14 heart looping ( normal looping, reverse looping, no looing) phenotypes in zebrafish embryos at  
15 48h. Bar graph represent distribution of different heart looping phenotypes in wild-type and in  
16 *nlz1*<sup>-/-</sup> mutant embryos. (D) Motile cilia in the KV were labelled with acetylated - $\alpha$ -tubulin  
17 antibody (green), nuclei were counterstained with DAPI (blue). In *nlz1*<sup>-/-</sup> mutant embryos  
18 (n=5/5) the number of KV cilia were dramatically reduced compared to *nlz1*<sup>+/+</sup> wild-type  
19 embryos (n=10/10). (E) Sequences of the *nlz1* target region in eight F1 putative mutant progeny.  
20 All sequences had indels close to *nlz1* target region (highlighted in yellow), and 5 different *nlz1*  
21 mutant alleles were recovered. The sequence variations are indicated in the right (+ insertion, -  
22 deletion), the wild-type reference allele sequence is underlined, and the protospacer- adjacent  
23 motif (PAM) is highlighted in blue. (A,B) Lateral view, anterior to left; (C) anterior view; (D)

1 flat mount of posterior region; a, atrium; v, ventricle; hy, hydrocephaly; ov, otic vesicle;KV,  
2 Kupffer's Vesicle; scale bar 100  $\mu$ m.

3 **Fig. S3 Nlz1 MO dose response in LR asymmetry**

4 Bar graph represents *lefty2* expression as a measure of laterality defects with various doses of  
5 Nlz1 MO injection. Ab: absent; Bi: bilateral; R: right; L: left.

6 **Fig. S4 *nlz1* expression pattern in zebrafish embryos**

7 (A-F') Whole mount *in situ* hybridization of zebrafish embryos with *nlz1* riboprobe at different  
8 developmental stages as indicated at the lower bottom of each panel. mhb, mid-hindbrain  
9 boundary; e, eye; pd, pronephric duct. (C', D', E') dorsal view; (E, F, F') lateral view.

10 **Fig.S5 *foxj1a* expression is unaltered in *nlz1* morphant embryos**

11 (A-C) Control MO injected, and (D-F) Nlz1 MO injected embryos were *in situ* hybridized with  
12 *foxj1a* antisense RNA probe. The stages of embryos are indicated on the top. Scale bar 50 $\mu$ m.  
13 (A,B,D,E) dorsal view; (C,F) lateral view.

14 **Fig. S6 Nlz1 is potentially a direct target of Foxj1a**

15 (A) Luciferase activity of transiently transfected 2kb-HNLZ1-*luc* construct in HEK293T cells.  
16 (B) ChIP assay using anti-Foxj1 antibody. IgG was used as a negative control.

17 **Fig.S7 *foxj1a* induce ectopic *nlz1* expression**

18 (A, A') control embryos and (B, B') *foxj1* mRNA injected embryos were fixed in PFA at 8-  
19 somite stage and *nlz1* expression was assayed by whole mount in-situ hybridization . Arrows  
20 indicate ectopic expression of *nlz1* (B, B', n=28/35) in the posterior region of the embryo. (A, B)  
21 lateral view, anterior to top; (A', B') posterior view.

# Fig S1

## A

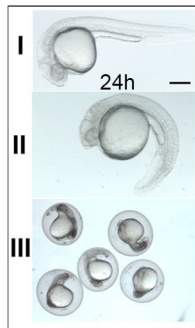

## B

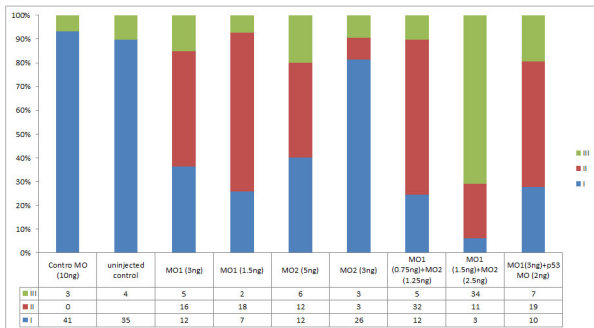

## C

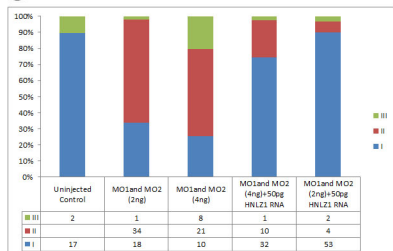

## D

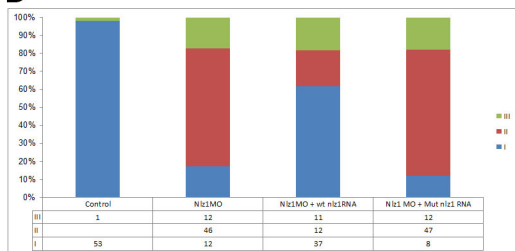

Fig S2

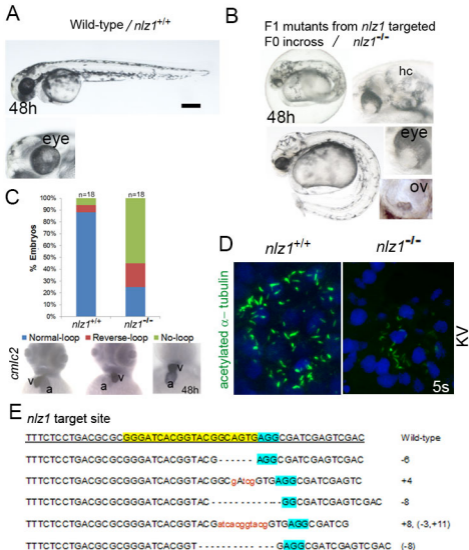

# Fig S3

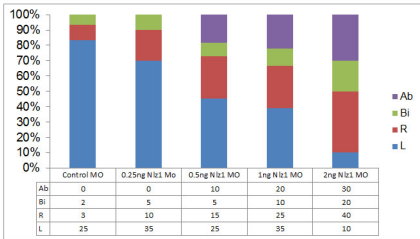

Fig S4

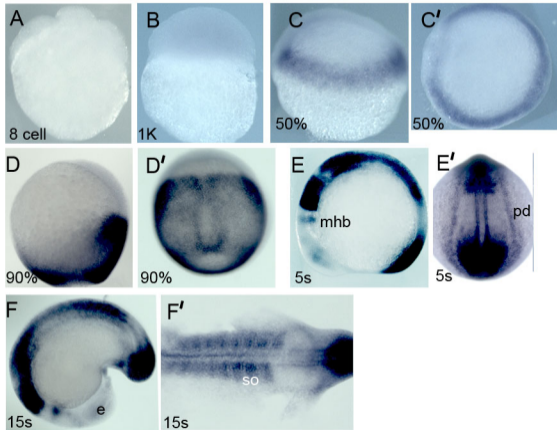



Fig S5

10h

12.5h

22h

control MO

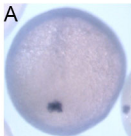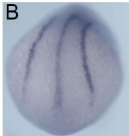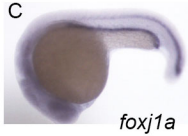

NIZ1 MO

3ng

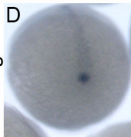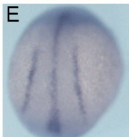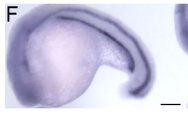

# Fig S6

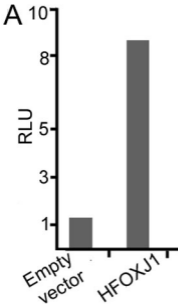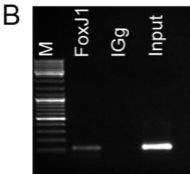

Fig S7

Control

A

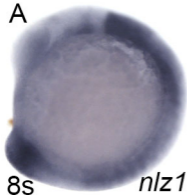

8s

*nlz1*

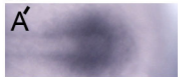

*foxj1* RNA

B

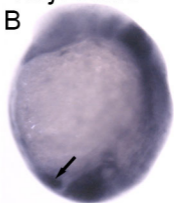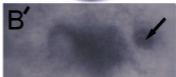

Supplement: NIHMS729294-supplement.pdf [file NIHMS729294-supplement.pdf]
